# Supplementary material for: Space–Time Patterns of Poultry Pathogens in the USA: A Case Study of Ornithobacterium rhinotracheale and Pasteurella multocida in Turkey Populations
Source: MDPI journal article supplement (doi:10.3390/pathogens12081004), 2023-07-31
Supplement: s1 [file s1]

**Supplementary Table S1.** Median allelic differences for *Ornithobacterium rhinotrachealis* (ORT) and *Pasteurella multocida* (PM) isolates between sampling year and within clusters derived from a minimum spanning tree analysis. Ni and Nc represent the number of available isolates and the number of 1:1 allelic comparisons between isolates for each year and cluster, respectively. The allelic difference between isolates is provided as median, min and max. A high median value represents a large allelic diversity between isolates within year or cluster.

| ORT     |                |                |        |     |     |
|---------|----------------|----------------|--------|-----|-----|
| Year    | N <sub>i</sub> | N <sub>c</sub> | Median | Min | Max |
| 2013    | 1              | n/a            | n/a    | n/a | n/a |
| 2014    | 3              | 6              | 19     | 0   | 36  |
| 2016    | 3              | 6              | 1      | 1   | 2   |
| 2018    | 29             | 812            | 484    | 0   | 517 |
| 2019    | 18             | 306            | 50     | 0   | 512 |
| 2020    | 14             | 182            | 15     | 0   | 512 |
| 2021    | 31             | 930            | 20     | 0   | 703 |
| Cluster | N <sub>i</sub> | N <sub>c</sub> | Median | Min | Max |
| 1       | 4              | 12             | 19     | 0   | 36  |
| 2a      | 28             | 756            | 8      | 0   | 69  |
| 2b      | 44             | 1892           | 10     | 0   | 72  |
| 3       | 23             | 506            | 2      | 0   | 10  |

**Supplementary Table S2.** Median allelic differences for *Pasteurella multocida* (PM) isolates between sampling year and within clusters derived from a minimum spanning tree analysis. Ni and Nc represent the number of available isolates and the number of 1:1 allelic comparisons between isolates for each year and cluster, respectively. The allelic difference between isolates is provided as median, min and max. A high median value represents a large allelic diversity between isolates within year or cluster.

| PM   |                |                |        |     |      |
|------|----------------|----------------|--------|-----|------|
| Year | N <sub>i</sub> | N <sub>c</sub> | Median | Min | Max  |
| 2013 | 1              | n/a            | n/a    | n/a | n/a  |
| 2014 | 3              | 6              | 1232   | 23  | 1233 |
| 2015 | 4              | 12             | 1217   | 0   | 1234 |
| 2016 | 11             | 110            | 1163   | 19  | 1235 |
| 2017 | 26             | 650            | 1098   | 13  | 1182 |

|             |    |     |      |      |      |
|-------------|----|-----|------|------|------|
| <b>2018</b> | 14 | 182 | 1095 | 3    | 1183 |
| <b>2019</b> | 3  | 6   | 6    | 3    | 7    |
| <b>2020</b> | 2  | 2   | 1117 | 1117 | 1117 |
| <b>2021</b> | 4  | 12  | 1212 | 143  | 1227 |

  

| <b>Cluster</b> | <b>N<sub>i</sub></b> | <b>N<sub>c</sub></b> | <b>Median</b> | <b>Min</b> | <b>Max</b> |
|----------------|----------------------|----------------------|---------------|------------|------------|
| <b>1</b>       | 16                   | 240                  | 26            | 3          | 52         |
| <b>2</b>       | 12                   | 132                  | 106           | 13         | 144        |
| <b>3</b>       | 7                    | 42                   | 63            | 3          | 96         |
| <b>4</b>       | 6                    | 30                   | 30            | 11         | 62         |
| <b>5</b>       | 5                    | 20                   | 72            | 0          | 143        |
| <b>6</b>       | 4                    | 12                   | 98            | 14         | 115        |
| <b>7</b>       | 3                    | 6                    | 40            | 25         | 44         |
| <b>8</b>       | 3                    | 6                    | 35            | 34         | 37         |
| <b>9</b>       | 3                    | 6                    | 27            | 9          | 30         |
| <b>10</b>      | 2                    | 1                    | 40            | 40         | 40         |
| <b>11</b>      | 2                    | 1                    | 58            | 58         | 58         |
| <b>12</b>      | 2                    | 1                    | 33            | 33         | 33         |
| <b>13</b>      | 2                    | 1                    | 13            | 13         | 13         |

**Supplementary Table S3.** *Ornithobacterium rhinotrachealis* (ORT) and *Pasteurella multocida* (PM) genomes sourced from GenBank and from collected Turkey isolates used for the development of the cgMLST schemes and further isolate characterization in the present study.

| Pathogen                       | Isolate ID    | SRA/Nucleotide Accessions number | Sequence Source |
|--------------------------------|---------------|----------------------------------|-----------------|
| <b><i>Ornithobacterium</i></b> | Sample_57     | SRR25316877                      | This Study      |
|                                | 14-5910       | SRR25316876                      | This Study      |
|                                | Sample_81     | SRR25316870                      | This Study      |
|                                | 10746-14      | SRR25316872                      | This Study      |
|                                | 240_OR7       | SRR25316873                      | This Study      |
|                                | 246_OR13      | SRR25316874                      | This Study      |
|                                | 247_OR_14     | SRR25316857                      | This Study      |
|                                | 249_OR_16     | SRR25316858                      | This Study      |
|                                | 25_Sample_122 | SRR25316859                      | This Study      |
|                                | 255_OR_22     | SRR25316860                      | This Study      |

|                              |                  |             |                         |
|------------------------------|------------------|-------------|-------------------------|
|                              | 263_OR30         | SRR25316875 | This Study              |
|                              | 41._Sample_161   | SRR25316861 | This Study              |
|                              | 53._Sample_191   | SRR25316862 | This Study              |
|                              | 61._Sample_210   | SRR25316863 | This Study              |
|                              | G203_S37         | SRR25316864 | This Study              |
|                              | ORT_109_S15      | SRR25316865 | This Study              |
|                              | ORT_64_S20       | SRR25316866 | This Study              |
|                              | Shen_1_sample_97 | SRR25316867 | This Study              |
|                              | UC_17_S29        | SRR25316868 | This Study              |
|                              | UC_18_S40        | SRR25316869 | This Study              |
|                              | UC_2_S72         | SRR25316871 | This Study              |
|                              | 41._ORT41        | SRR8654981  | Downloaded from GenBank |
|                              | 8._ORT8          | SRR8654988  | Downloaded from GenBank |
|                              | DSM 15997        | SRR3926759  | Downloaded from GenBank |
|                              | ORT105           | SRR10600831 | Downloaded from GenBank |
|                              | ORT109           | SRR10600826 | Downloaded from GenBank |
|                              | ORT113           | SRR10600822 | Downloaded from GenBank |
|                              | ORT116           | SRR10600819 | Downloaded from GenBank |
|                              | ORT118           | SRR10600817 | Downloaded from GenBank |
|                              | ORT126           | SRR10600808 | Downloaded from GenBank |
|                              | ORT133           | SRR10600800 | Downloaded from GenBank |
|                              | ORT149           | SRR10600782 | Downloaded from GenBank |
| <i>Pasteurella multocida</i> | 6717             | SRR25320037 | This Study              |
|                              | 6814             | SRR25320038 | This Study              |
|                              | 7602             | SRR25320049 | This Study              |
|                              | 9170             | SRR25320057 | This Study              |
|                              | 9186             | SRR25320036 | This Study              |
|                              | 9320             | SRR25320035 | This Study              |
|                              | 9334             | SRR25320034 | This Study              |
|                              | 9455             | SRR25320030 | This Study              |
|                              | 9710             | SRR25320029 | This Study              |
|                              | 10081            | SRR25320028 | This Study              |
|                              | 10166            | SRR25320039 | This Study              |
|                              | 10253            | SRR25320040 | This Study              |
|                              | 10342            | SRR25320041 | This Study              |
|                              | 10378            | SRR25320042 | This Study              |
|                              | 10516            | SRR25320043 | This Study              |
|                              | 10757            | SRR25320044 | This Study              |
|                              | 10848            | SRR25320045 | This Study              |
|                              | 10976            | SRR25320046 | This Study              |
|                              | 11006            | SRR25320047 | This Study              |
|                              | 11145            | SRR25320048 | This Study              |
|                              | 11244            | SRR25320050 | This Study              |
|                              | 28921            | SRR25320051 | This Study              |
|                              | 28936            | SRR25320052 | This Study              |
|                              | 14-1155-2        | SRR25320053 | This Study              |

|  |            |             |                         |
|--|------------|-------------|-------------------------|
|  | 15-15053   | SRR25320054 | This Study              |
|  | 16-18953   | SRR25320055 | This Study              |
|  | 17-17161-1 | SRR25320031 | This Study              |
|  | 18-18824-1 | SRR25320032 | This Study              |
|  | CU-1       | SRR25320033 | This Study              |
|  | SEPTICA    | SRR25320056 | This Study              |
|  | VAC1       | SRR25320059 | This Study              |
|  | VAC9       | SRR25320058 | This Study              |
|  | PM1614     | SRR10485187 | Downloaded from GenBank |
|  | 5          | SRR5192694  | Downloaded from GenBank |
|  | 10027      | SRR5192725  | Downloaded from GenBank |
|  | 9486       | SRR5192656  | Downloaded from GenBank |
|  | 9719       | SRR5192632  | Downloaded from GenBank |
|  | 6054       | SRR5192685  | Downloaded from GenBank |
|  | 6630       | SRR5192679  | Downloaded from GenBank |
|  | 9832       | SRR5192621  | Downloaded from GenBank |
|  | 10045      | SRR5192722  | Downloaded from GenBank |
|  | 9673       | SRR5192640  | Downloaded from GenBank |
|  | 9821       | SRR5192623  | Downloaded from GenBank |
|  | Liver3     | SRR5192588  | Downloaded from GenBank |
|  | 9613       | SRR5192645  | Downloaded from GenBank |
|  | 9237       | SRR5192664  | Downloaded from GenBank |
|  | 9904       | SRR5192608  | Downloaded from GenBank |
|  | 9955       | SRR5192602  | Downloaded from GenBank |
|  | 9488       | SRR5192655  | Downloaded from GenBank |
|  | 10086      | SRR5192712  | Downloaded from GenBank |
|  | 9612       | SRR5192646  | Downloaded from GenBank |
|  | 9621       | SRR5192644  | Downloaded from GenBank |
|  | 9981       | SRR5192594  | Downloaded from GenBank |
|  | P-1591     | SRR5192581  | Downloaded from GenBank |
|  | 6114       | SRR5192681  | Downloaded from GenBank |
|  | 9847       | SRR5192617  | Downloaded from GenBank |
|  | 9605       | SRR5192647  | Downloaded from GenBank |
|  | 9185       | SRR5192668  | Downloaded from GenBank |
|  | 5864       | SRR5192689  | Downloaded from GenBank |
|  | 9224       | SRR5192665  | Downloaded from GenBank |
|  | 9846       | SRR5192618  | Downloaded from GenBank |
|  | 9242       | SRR5192663  | Downloaded from GenBank |
|  | 9972       | SRR5192598  | Downloaded from GenBank |
|  | 10088      | SRR5192711  | Downloaded from GenBank |
|  | 9464       | SRR5192657  | Downloaded from GenBank |
|  | 9956       | SRR5192601  | Downloaded from GenBank |
|  | 10067      | SRR5192714  | Downloaded from GenBank |
|  | 10046      | SRR5192721  | Downloaded from GenBank |
|  | 9866       | SRR5192616  | Downloaded from GenBank |
|  | 10042      | SRR5192723  | Downloaded from GenBank |

|  |                 |               |                         |
|--|-----------------|---------------|-------------------------|
|  | P-1662          | SRR5192580    | Downloaded from GenBank |
|  | 9599            | SRR5192649    | Downloaded from GenBank |
|  | 9076            | SRR5192671    | Downloaded from GenBank |
|  | 6846            | SRR5192675    | Downloaded from GenBank |
|  | 10091           | SRR5192710    | Downloaded from GenBank |
|  | 9102            | SRR5192669    | Downloaded from GenBank |
|  | 10049           | SRR5192720    | Downloaded from GenBank |
|  | 9198            | SRR5192666    | Downloaded from GenBank |
|  | P-1059-1        | SRR5192570    | Downloaded from GenBank |
|  | P-1702          | SRR5192579    | Downloaded from GenBank |
|  | P-2192          | SRR5192575    | Downloaded from GenBank |
|  | P-1997          | SRR5192578    | Downloaded from GenBank |
|  | P-1581          | SRR5192582    | Downloaded from GenBank |
|  | P-2095          | SRR5192577    | Downloaded from GenBank |
|  | P-2100          | SRR5192576    | Downloaded from GenBank |
|  | P-903           | SRR5192571    | Downloaded from GenBank |
|  | P-1573          | SRR5192583    | Downloaded from GenBank |
|  | P-2225          | SRR5192574    | Downloaded from GenBank |
|  | P-2237          | SRR5192573    | Downloaded from GenBank |
|  | P-2723          | SRR5192572    | Downloaded from GenBank |
|  | M-1404          | SRR5192586    | Downloaded from GenBank |
|  | P1059-gallicida | CM001581.1    | Downloaded from GenBank |
|  | FDAARGOS_218    | NZ_CP020405.2 | Downloaded from GenBank |
|  | RCAD0259        | CP014157.1    | Downloaded from GenBank |
|  | Ban-PM4         | CP052764.1    | Downloaded from GenBank |
|  | X-73            | NZ_CM001580.1 | Downloaded from GenBank |
